# Supplementary material for: Isolation and Genetic Characterization of Toxoplasma gondii from a Patas Monkey (Erythrocebus patas) in China
Source: MDPI journal article supplement (doi:10.3390/genes14081606), 2023-08-10
Supplement: s1 [file s1]

**Table S1 Summary of viable *T. gondii* isolates (n=169) from animals and human in China**

| Province                                                  | species                   | No. of animls | Seroprevalence          | Bioassay of tissues <sup>b</sup> |          |                                                                                                                                                     | Genotype ToxoDB#                          | References                             |
|-----------------------------------------------------------|---------------------------|---------------|-------------------------|----------------------------------|----------|-----------------------------------------------------------------------------------------------------------------------------------------------------|-------------------------------------------|----------------------------------------|
|                                                           |                           |               | Test, cut-off titer (%) | Number                           | Positive | Strain ID                                                                                                                                           |                                           |                                        |
| Beijing                                                   | Stray cat                 | 64            | MAT, 20 (58)            | 23                               | 11       | TgCatBj1-11                                                                                                                                         | All #9                                    | Qian et al. (2012)                     |
| Anhui (22),<br>Hubei (23),<br>Guangdong (20), Shanxi (24) | cat                       | 211           | ND                      | 89                               | 14       | TgCtys1,2<br>TgCtwh1-8, TgCtgd1,2<br>TgCtsx1,2                                                                                                      | 12 #9, 2 #205                             | Chen et al. (2011)                     |
| ND                                                        | Human cat                 | ND            | ND                      | ND                               | 23       | TgHuZSE, TgHuZS2, TgHuAh1-2,<br>TgCtwh9-12,14,19<br>TgCtxz1-8, TgCtsd1-5                                                                            | 15 #9, 2 #10,<br>1 #1, 1 #204,<br>4 #205  | Wang et al. (2013a)                    |
| Guizhou (23+17),<br>Anhui (24),<br>Hubei (13)             | Cat,Pig,<br>Chicken,vole  | 77            | ND                      | B                                | 11       | TgCtgy1-5, TgCtgy1-4<br>TgCksz1, TgVowh1                                                                                                            | 10 #9,<br>1 #205                          | Wang et al. (2013b)                    |
| Guangdong                                                 | Market cat                | 34            | MAT, 40(79)             | 27                               | 17       | TgCtPRC1-17                                                                                                                                         | 2#18, 15#9                                | Dubey et al. (2007)                    |
| Guangdong                                                 | Human, Pig,<br>Cat, Sheep | ND            | ND                      | ND                               | 17       | SH, CN,NT, TgC1-TgC8<br>GYS,PYS,ZC,ZS,ZS1,QHO                                                                                                       | 3 #10, 1 #3,<br>12 #9, 1 # MIX            | Zhou et al. (2009)                     |
| Shanghai                                                  | rabbit                    | 77            | MAT,25(23)              | 18                               | 1        | SHR                                                                                                                                                 | SAG2, SAG3,<br>GRA6, BTUB<br>All type III | Zhou et al. (2013)                     |
| Liaoning                                                  | pig                       | 2063          | MAT,25(11.3)            | 233                              | 23       | TgPigCn3-2, 3-12, 5-5,5-6,5-7, 8-16,<br>8-18,10-34,14-56,19-24, 22-10,27-8,<br>29-5, 33-6,40-10, 58-14, 61-11,69-2,<br>69-14,77-2,80-11,80-25,80-27 | 1#3,<br>1#3 or #1,<br>13#9                | Wang et al., 2016                      |
| Kunming                                                   | feline feces              | 115           | Morphology, (4)         | ND                               | 1        | KM isolate                                                                                                                                          | type II                                   | Liang et al., 2016                     |
| Guizhou                                                   | Pig, cat                  | 70+19         | ELISA, (49+12)          | ND                               | 5        | TGGZ1-3(pig), TGGZ4-5(cat)                                                                                                                          | All #9                                    | Li et at., 2015                        |
| Jiangsu                                                   | human fetus<br>pigs       | ND            | ND                      | ND                               | 3        | KS, YZ-1, YZ-2                                                                                                                                      | 1 #10,<br>2#9                             | Hou et al., 2018<br>Zhang et al., 1987 |
| Henan <sup>c</sup> , Zhejiang                             | Stray cat, pet cat        | 42            | MAT, 100(50)            | 42                               | 8+1=9    | TgCatCHn1-3, TgCatCZg1-5<br>TgCatCHn4 (feces)                                                                                                       | 6 #9, 1 #1,<br>1 #2, 1 #17                | Yang et al., 2015                      |
| Henan                                                     | Hospital cat              | 28            | MAT,25(7)               | 8,                               | 1        | TgCatCHn5                                                                                                                                           | #9, 1                                     | Yang et al., 2017a                     |
| Henan                                                     | Sheep                     | 840           | MAT,25(20.7)            | 26                               | 2        | TgSheepHn1-2                                                                                                                                        | All #9                                    | Yang et al., 2017b                     |

|       |                                                                                                         |     |              |    |    |                 |            |                            |
|-------|---------------------------------------------------------------------------------------------------------|-----|--------------|----|----|-----------------|------------|----------------------------|
| Henan | Sheep                                                                                                   | 166 | MAT,100(25)  | 67 | 11 | TgSheepHn3-13   | 7 #2, 4 #4 | Jiang et al., 2020a        |
| Henan | Sheep                                                                                                   | 224 | MAT,100(1.8) | 4  | 1  | TgSheepHn14     | #3         | Jiang et al., 2023         |
| Henan | Kangaroo                                                                                                | 4   | MAT,25(75)   | 4  | 1  | TgRooCHn1       | #292       | Su et al., 2019            |
| Henan | Kangaroo                                                                                                | 3   | MAT,25(67)   | 3  | 2  | TgRooCHn2-3     | #3, #2     | Yang et al., 2023a         |
| Henan | Kangaroo                                                                                                | 26  | MAT,25(50)   | 6  | 1  | TgRooCHn4       | #3         | Yang et al., 2023b         |
| Henan | Red panda                                                                                               | 14  | MAT,25(14)   | 8  | 1  | TgRedpandaCHn1  | #20        | Yang et al., 2019a         |
| Henan | Serval                                                                                                  | 1   | MAT,25(100)  | 1  | 1  | TgServalCHn1    | #20        | Dong et al., 2019          |
| Henan | Tiger                                                                                                   | 10  | MAT,25(80)   | 6  | 2  | TgTigerCHn1-2   | All #9     | Yang et al., 2019b         |
| Henan | Tiger                                                                                                   | 4   | MAT,25(100)  | 4  | 2  | TgTigerCHn3-4   | #20, #2    | Ren et al., 2022           |
| Henan | Caracal                                                                                                 | 2   | MAT,25(100)  | 2  | 1  | TgCaracalCHn1   | #2         | Jiang et al., 2020b        |
| Henan | Caracal                                                                                                 | 1   | MAT,25(100)  | 1  | 1  | TgCaracalCHn2   | #5         | Ren HJ et al., unpublished |
| Henan | white spoonbills                                                                                        | 7   | MAT,4(29)    | 2  | 1  | TgSpoonbillCHn1 | #2         | Yang et al., 2020          |
| Henan | Monkey                                                                                                  | 15  | MAT,8(47)    | 9  | 1  | TgMonkeyCHn1    | Mix        | Xin et al., 2022           |
| Henan | Monkey                                                                                                  | 13  | MAT,8(62)    | 9  | 1  | TgMonkeyCHn2    | #9         | This study                 |
| Henan | Monkey                                                                                                  | 9   | MAT,8(22)    | 3  | 1  | TgMonkeyCHn3    | #6         | Ma YH et al., unpublished  |
| Henan | Cheetah                                                                                                 | 6   | MAT,25(100)  | 6  | 2  | TgCheetahCHn1-2 | #319, #9   | Zhu NP et al., unpublished |
| Henan | Fur seal                                                                                                | 4   | MAT,25(50)   | 4  | 1  | TgfursealCHn1   | #5         | Mao GH et al., unpublished |
| Total | 110 #9, 12 #2, 7 #205, 6 #10, 6 #3, 4 #4, 3 #20, 2 #1, 2 #18, 2 #5, 1 #6, 1 #204, 1 #17, 1 #292, 1 #319 |     |              |    |    |                 |            |                            |

ND: experiment not done;

MAT: modified agglutination test;

ELISA: enzyme-linked immunosorbent assay.

## References

1. Chen ZW, Gao JM, Huo XX, Wang L, Yu L, Halm-Lai F, Xu YH, Song WJ, Hide G, Shen JL, Lun ZR. Genotyping of *Toxoplasma gondii* isolates from cats in different geographic regions of China. *Vet Parasitol.* 2011, 183(1-2): 166-70.
2. Dong H, Su R, Li T, Su C, Zhang L, Yang Y. Isolation, genotyping and pathogenicity of a *Toxoplasma gondii* strain isolated from a Serval (*Leptailurus serval*) in China. *Transbound Emerg Dis.* 2019, 66(4): 1796-1802.
3. Dubey JP, Zhu XQ, Sundar N, Zhang H, Kwok OC, Su C. Genetic and biologic characterization of *Toxoplasma gondii* isolates of cats from China. *Vet Parasitol.* 2007, 145(3-4): 352-356.
4. Hou Z, Zhou Y, Liu D, Su S, Zhao Z, Xu J, Tao J. Genotyping and virulence analysis of *Toxoplasma gondii* isolates from a dead human fetus and dead pigs in Jiangsu province, Eastern China. *Acta Parasitol.* 2018, 63(2): 397-411.
5. Jiang N, Su R, Jian F, Su C, Zhang L, Jiang Y, Yang Y. *Toxoplasma gondii* in lambs of China: heart juice serology, isolation and genotyping. *Int J Food Microbiol.* 2020a, 322: 108563.
6. Jiang N, Xin S, Li J, Su C, Zhang L, Yang Y. Isolation and characterization of *Toxoplasma gondii* from captive caracals (*Caracal caracal*). *Int J Parasitol Parasites Wildl.* 2020b, 13: 196-201.
7. Jiang Y, Xin S, Ma Y, Zhang H, Yang X, Yang Y. Low Prevalence of *Toxoplasma gondii* in sheep and isolation of a Viable Strain from Edible Mutton from Central China. *Pathogens (Basel, Switzerland),* (2023).12(6), 827.
8. Li YN, Nie X, Peng QY, Mu XQ, Zhang M, Tian MY, Min SJ. Seroprevalence and genotype of *Toxoplasma gondii* in pigs, dogs and cats from Guizhou province, Southwest China. *Parasit Vectors.* 2015, 8:214.
9. Liang Y, Chen J, Meng Y, Zou F, Hu J, Esch GW. Occurrence and genetic characterization of GRA6 and SAG2 from *Toxoplasma gondii* oocysts in cat feces, Kunming, China. *Southeast Asian J Trop Med Public Health.* 2016, 47(6):1134-1142.
10. Qian W, Wang H, Su C, Shan D, Cui X, Yang N, Lv C, Liu Q. Isolation and characterization of *Toxoplasma gondii* strains from stray cats revealed a single genotype in Beijing, China. *Vet Parasitol.* 2012, 187(3-4): 408-413.
11. Ren H, Yang L, Zhu N, Li J, Su C, Jiang Y, Yang Y. Additional evidence of tigers (*Panthera tigris altaica*) as intermediate hosts for *Toxoplasma gondii* through the isolation of viable strains. *Int J Parasitol Parasites Wildl.* 2022, 19:330-335.
12. Su R, Dong H, Li T, Jiang Y, Yuan Z, Su C, Zhang L, Yang Y. *Toxoplasma gondii* in four captive kangaroos (*Macropus* spp.) in China: Isolation of a strain of a new genotype from an eastern grey kangaroo (*Macropus giganteus*). *Int J Parasitol Parasites Wildl.* 2019, 8: 234-239.

13. Wang L, Chen H, Liu D, Huo X, Gao J, Song X, Xu X, Huang K, Liu W, Wang Y, Lu F, Lun ZR, Luo Q, Wang X, Shen J. Genotypes and mouse virulence of *Toxoplasma gondii* isolates from animals and humans in China. PLoS One. 2013a, 8(1): e53483.
14. Wang L, Cheng HW, Huang KQ, Xu YH, Li YN, Du J, Yu L, Luo QL, Wei W, Jiang L, Shen JL. *Toxoplasma gondii* prevalence in food animals and rodents in different regions of China: isolation, genotyping and mouse pathogenicity. Parasit Vectors. 2013b, 6: 273.
15. Wang D, Liu Y, Jiang T, Zhang G, Yuan G, He J, Su C, Yang N. Seroprevalence and genotypes of *Toxoplasma gondii* isolated from pigs intended for human consumption in Liaoning province, northeastern China. Parasit Vectors. 2016, 9: 248.
16. Xin S, Jiang N, Yang L, Zhu N, Huang W, Li J, Zhang L, Su C, Yang Y. Isolation, genotyping and virulence determination of a *Toxoplasma gondii* strain from non-human primate from China. Transbound Emerg Dis. 2022, 69(2): 919-925.
17. Yang L, Xin S, Zhu N, Li J, Su C, Yang Y. Two viable *Toxoplasma gondii* isolates from red-necked wallaby (*Macropus rufogriseus*) and red kangaroo (*M. rufus*). Parasitol Int. 2023a, 92: 102687.
18. Yang L, Ren H, Zhu N, Mao G, Li J, Su C, Jiang Y, Yang Y. Epidemiology and isolation of viable *Toxoplasma gondii* strain from macropods. Heliyon. 2023b, 9(3): e13960.
19. Yang Y, Dong H, Su R, Li T, Jiang N, Su C, Zhang L. Evidence of red panda as an intermediate host of *Toxoplasma gondii* and *Sarcocystis* species. Int J Parasitol Parasites Wildl. 2019a, 8: 188-191.
20. Yang Y, Dong H, Su R, Jiang N, Li T, Su C, Yuan Z, Zhang L. Direct evidence of an extra-intestinal cycle of *Toxoplasma gondii* in tigers (*Panthera tigris*) by isolation of viable strains. Emerg. Microbes Infect. 2019b, 8(1): 1550–1552.
21. Yang Y, Jiang N, Xin S, Zhang L. *Toxoplasma gondii* infection in white spoonbills (*Platalea leucorodia*) from Henan Province, China. Emerg Microbes Infect. 2020, 9(1): 2619-2621.
22. Yang YR, Feng YJ, Lu YY, Dong H, Li TY, Jiang YB, Zhu XQ, Zhang LX. Antibody detection, isolation, genotyping, and virulence of *Toxoplasma gondii* in captive felids from China. Front Microbiol. 2017a, 8: 1414.
23. Yang Y, Feng Y, Yao Q, Wang Y, Lu Y, Liang H, Zhu X, Zhang L. Seroprevalence, isolation, genotyping, and pathogenicity of *Toxoplasma gondii* strains from sheep in China. Front Microbiol. 2017b, 8: 136.
24. Yang Y, Ying Y, Verma SK, Cassinelli AB, Kwok OC, Liang H, Pradhan AK, Zhu XQ, Su C, Dubey JP. Isolation and genetic characterization of viable *Toxoplasma gondii* from tissues and feces of cats from the central region of China. Vet Parasitol. 2015, 211(3-4): 283-288.
25. Zhou Y, Zhang H, Cao J, Gong H, Zhou J. Isolation and genotyping of *Toxoplasma gondii* from domestic rabbits

in China to reveal the prevalence of type III strains. *Vet Parasitol.* 2013, 193(1-3): 270-276.

26. Zhou P, Zhang H, Lin RQ, Zhang DL, Song HQ, Su C, Zhu XQ. Genetic characterization of *Toxoplasma gondii* isolates from China. *Parasitol Int.* 2009, 58(2): 193-195.
27. Zhang W., Liu J.S., Ma Y.W., Lu S. 1987. *Toxoplasma gondii* isolated from a dead deformed fetus. *Chinese Journal of Zoonoses*, 3, 26 (in Chinese).
